# Supplementary material for: The role of cerebral blood flow volume in cortical inhibition during postural changes
Source: PeerJ. 2025 Oct 27;13:e20233. doi: 10.7717/peerj.20233 (PMC12574591; doi:10.7717/peerj.20233)
Supplement: Supplemental Information 72 [file peerj-13-20233-s072.xlsx]

## Sheet: Test 1
Males																					Females
Systolic Arterial Pressure (mm Hg)																					Systolic Arterial Pressure (mm Hg)
Body positions/ Participants	1	2	3	4	5	6	7	8	9	10	11	12	13	14	15	16	17	18	19	20	Body positions/ Participants	1	2	3	4	5	6	7	8	9	10	11	12	13	14	15	16	17	18	19	20
SA	114	113	123	125	106	112	124	134	107	118	108	128	125	125	120	139	102	123	123	123	SA	107	119	102	114	118	108	112	123	111	118	108	108	110	110	104	111	116	115	122	105
HA	117	114	121	122	110	117	124	134	101	123	111	116	121	126	128	131	109	117	117	130	HA	103	125	96	120	113	116	117	124	106	117	106	108	101	105	99	114	112	118	109	100
HB	115	115	112	121	110	111	119	122	97	121	110	110	119	121	124	126	109	116	105	127	HB	93	114	97	109	111	105	112	114	105	111	101	106	103	103	93	113	111	111	109	101
SB	123	100	123	120	105	122	125	124	110	124	113	118	126	129	123	142	102	114	117	132	SB	101	122	102	122	109	114	111	115	109	112	105	107	116	111	100	118	115	115	115	103
Dyastolic Arterial Pressure (mm Hg)																					Dyastolic Arterial Pressure (mm Hg)
Body positions/ Participants	1	2	3	4	5	6	7	8	9	10	11	12	13	14	15	16	17	18	19	20	Body positions/ Participants	1	2	3	4	5	6	7	8	9	10	11	12	13	14	15	16	17	18	19	20
SA	72	74	72	76	61	64	77	73	73	67	78	75	77	80	74	80	68	61	85	73	SA	85	82	64	83	73	76	68	81	72	84	71	58	68	71	67	76	89	74	80	73
HA	56	59	63	66	50	57	73	66	59	59	70	70	64	77	64	83	62	57	64	65	HA	72	73	59	74	64	72	56	76	63	75	70	63	60	61	59	67	75	64	71	66
HB	58	62	61	66	52	53	67	61	61	66	65	65	64	76	64	77	64	56	61	67	HB	63	71	65	74	64	62	59	72	59	75	65	60	58	60	57	79	79	64	73	67
SB	69	61	73	76	66	69	83	68	78	72	78	78	70	80	75	84	72	62	80	77	SB	74	90	68	83	78	72	69	81	69	77	75	64	70	72	70	84	88	80	80	79
Pulse Arterial Pressure (mm Hg)																					Pulse Arterial Pressure (mm Hg)
Body positions/ Participants	1	2	3	4	5	6	7	8	9	10	11	12	13	14	15	16	17	18	19	20	Body positions/ Participants	1	2	3	4	5	6	7	8	9	10	11	12	13	14	15	16	17	18	19	20
SA	42	39	51	49	45	48	47	61	34	51	30	53	48	45	46	59	34	62	38	50	SA	22	37	38	31	45	32	44	42	39	34	37	50	42	39	37	35	27	41	42	32
HA	61	55	58	56	60	60	51	68	42	64	41	46	57	49	66	48	47	60	53	65	HA	31	52	37	46	49	44	61	48	43	42	36	45	41	44	40	47	37	54	38	34
HB	57	53	51	55	58	58	52	61	36	55	45	45	55	47	62	49	45	60	44	60	HB	30	43	32	35	47	43	53	42	46	36	36	46	45	43	36	34	32	47	36	34
SB	54	39	50	44	39	53	42	56	32	52	35	40	56	49	48	58	30	52	37	55	SB	27	32	34	39	31	42	42	34	40	35	30	43	46	38	30	34	27	35	35	24
Heart rate (beats/min)																					Heart rate (beats/min)
Body positions/ Participants	1	2	3	4	5	6	7	8	9	10	11	12	13	14	15	16	17	18	19	20	Body positions/ Participants	1	2	3	4	5	6	7	8	9	10	11	12	13	14	15	16	17	18	19	20
SA	75	74	74	77	75	72	93	92	65	61	86	92	81	88	65	88	77	75	75	69	SA	91	79	70	81	88	67	84	105	77	67	79	54	73	77	67	72	79	88	98	66
HA	62	63	65	64	64	63	73	72	45	50	72	74	73	87	49	83	64	73	66	59	HA	80	88	62	68	83	57	76	96	69	63	81	45	65	70	61	66	56	73	82	49
HB	59	64	69	59	59	61	73	68	48	52	73	75	86	95	52	98	79	74	70	65	HB	82	66	68	80	82	55	77	77	76	63	76	42	66	68	71	64	60	76	76	52
SB	69	74	81	74	87	79	95	77	67	60	82	80	85	83	53	94	85	77	86	71	SB	90	79	69	79	85	64	86	94	84	65	80	45	71	75	91	85	81	85	91	64

## Sheet: Test 2
Males																		Females
Systolic Arterial Pressure (mm Hg)																		Systolic Arterial Pressure (mm Hg)
Body positions/ Participants	1	2	3	4	5	6	7	8	9	10	11	12	13	14	15	16	17	Body positions/ Participants	1	2	3	4	5	6	7	8	9	10	11	12	13	14	15	16	17	18	19	20
oSA	108	106	113	91	114	124	124	115	121	107	134	118	118	113	130	105	118	oSA	104	131	103	114	106	106	113	118	115	117	110	111	126	115	111	102	111	121	113	112
oHA	107	111	114	102	108	126	131	117	123	114	133	126	126	126	130	114	112	oHA	96	118	102	115	108	115	112	124	104	117	122	103	122	109	107	100	108	117	114	111
oHB	109	109	108	100	112	122	127	113	121	113	126	125	115	115	127	108	115	oHB	93	118	106	113	107	111	107	116	104	114	112	102	125	105	105	103	107	123	121	109
oSB	112	105	115	102	112	132	139	125	115	117	130	124	123	123	130	109	114	oSB	104	126	104	114	110	117	111	109	113	116	113	102	114	111	100	109	115	124	118	114
Dyastolic Arterial Pressure (mm Hg)																		Dyastolic Arterial Pressure (mm Hg)
Body positions/ Participants	1	2	3	4	5	6	7	8	9	10	11	12	13	14	15	16	17	Body positions/ Participants	1	2	3	4	5	6	7	8	9	10	11	12	13	14	15	16	17	18	19	20
oSA	64	69	65	52	67	79	76	71	75	72	80	82	73	73	84	72	68	oSA	76	85	68	82	75	67	72	67	73	88	72	68	80	75	78	71	72	86	69	83
oHA	57	57	54	52	55	69	69	60	60	69	69	79	60	60	78	63	53	oHA	72	75	63	68	63	71	63	69	64	75	63	60	75	67	63	63	69	77	73	75
oHB	62	72	56	50	55	68	68	62	61	71	83	77	55	55	70	63	55	oHB	66	73	71	81	62	66	61	62	64	72	69	61	83	65	60	67	65	82	74	76
oSB	69	69	69	60	73	82	78	71	72	79	80	89	76	76	88	78	64	oSB	81	84	70	81	74	79	75	69	72	81	76	68	86	81	76	71	86	87	78	86
Pulse Arterial Pressure (mm Hg)																		Pulse Arterial Pressure (mm Hg)
Body positions/ Participants	1	2	3	4	5	6	7	8	9	10	11	12	13	14	15	16	17	Body positions/ Participants	1	2	3	4	5	6	7	8	9	10	11	12	13	14	15	16	17	18	19	20
oSA	44	37	48	39	47	45	48	44	46	35	54	36	45	40	46	33	50	oSA	28	46	35	32	31	39	41	51	42	29	38	43	46	40	33	31	39	35	44	29
oHA	50	54	60	50	53	57	62	57	63	45	64	47	66	66	52	51	59	oHA	24	43	39	47	45	44	49	55	40	42	59	43	47	42	44	37	39	40	41	36
oHB	47	37	52	50	57	54	59	51	60	42	43	48	60	60	57	45	60	oHB	27	45	35	32	45	45	46	54	40	42	43	41	42	40	45	36	42	41	47	33
oSB	43	36	46	42	39	50	61	54	43	38	50	35	47	47	42	31	50	oSB	23	42	34	33	36	38	36	40	41	35	37	34	28	30	24	38	29	37	40	28
Heart rate (beats/min)																		Heart rate (beats/min)
Body positions/ Participants	1	2	3	4	5	6	7	8	9	10	11	12	13	14	15	16	17	Body positions/ Participants	1	2	3	4	5	6	7	8	9	10	11	12	13	14	15	16	17	18	19	20
oSA	70	73	65	62	76	85	82	78	74	83	87	97	66	62	95	74	71	oSA	88	76	70	87	95	68	90	89	74	77	88	45	80	85	80	70	65	64	66	95
oHA	61	57	60	60	61	59	71	57	58	84	62	78	59	49	87	62	64	oHA	87	68	70	72	76	57	78	83	70	68	92	42	70	75	55	63	65	51	68	80
oHB	63	85	62	53	70	67	66	61	60	70	82	82	57	54	74	65	62	oHB	82	66	74	72	75	61	78	73	73	64	86	42	81	75	56	70	64	58	71	83
oSB	71	78	74	75	77	77	65	81	87	89	84	98	56	64	90	79	71	oSB	97	70	73	80	81	75	93	75	74	68	91	45	82	90	78	82	64	66	77	87
