# Supplementary material for: The role of cerebral blood flow volume in cortical inhibition during postural changes
Source: PeerJ. 2025 Oct 27;13:e20233. doi: 10.7717/peerj.20233 (PMC12574591; doi:10.7717/peerj.20233)
Supplement: Supplemental Information 73 [file peerj-13-20233-s073.xlsx]

## Sheet: REG 1 G. (m)
Left FM	Samples/Indexes	RWA (Ohm)	VO (%)	АT (s)	CT (s)	Body positions/Indexes	RWA (Ohm)	VO (%)	АT (s)	CT (s)
	Sitting A1	0.11	6.5	0.1	0.48	Sitting A	0.11	6.5	0.1	0.49
	Sitting A2	0.11	6.5	0.1	0.5	Horizontal A	0.115	10.2	0.125	0.59
	Horizontal A1	0.11	7.9	0.11	0.59	Horizontal B	0.125	15.4	0.15	0.6
	Horizontal A2	0.12	12.5	0.14	0.59	Sitting B	0.12	4.1	0.1	0.51
	Horizontal B1	0.12	16.9	0.15	0.6
	Horizontal B2	0.13	13.9	0.15	0.6
	Sitting B1	0.12	3.4	0.1	0.52
	Sitting B2	0.12	4.8	0.1	0.5
Right FM	Samples/Indexes	RWA (Ohm)	VO (%)	АT (s)	CT (s)	Body positions/Indexes	RWA (Ohm)	VO (%)	АT (s)	CT (s)
	Sitting A1	0.12	21.2	0.12	0.47	Sitting A	0.12	20.2	0.12	0.48
	Sitting A2	0.12	19.2	0.12	0.49	Horizontal A	0.11	3.4	0.1	0.475
	Horizontal A1	0.11	5.1	0.1	0.48	Horizontal B	0.105	7.2	0.115	0.625
	Horizontal A2	0.11	1.7	0.1	0.47	Sitting B	0.135	22.8	0.125	0.505
	Horizontal B1	0.1	9.3	0.12	0.63
	Horizontal B2	0.11	5.1	0.11	0.62
	Sitting B1	0.14	23.6	0.12	0.52
	Sitting B2	0.13	22	0.13	0.49
Left ОM	Samples/Indexes	RWA (Ohm)	VO (%)	АT (s)	CT (s)	Body positions/Indexes	RWA (Ohm)	VO (%)	АT (s)	CT (s)
	Sitting A1	0.09	6.1	0.1	0.49	Sitting A	0.095	5.45	0.1	0.5
	Sitting A2	0.1	4.8	0.1	0.51	Horizontal A	0.08	3.5	0.1	0.615
	Horizontal A1	0.08	4.3	0.1	0.6	Horizontal B	0.09	11.05	0.13	0.625
	Horizontal A2	0.08	2.7	0.1	0.63	Sitting B	0.125	2.3	0.09	0.54
	Horizontal B1	0.09	10.9	0.14	0.62
	Horizontal B2	0.09	11.2	0.12	0.63
	Sitting B1	0.13	4.5	0.09	0.55
	Sitting B2	0.12	0.1	0.09	0.53
Right ОM	Samples/Indexes	RWA (Ohm)	VO (%)	АT (s)	CT (s)	Body positions/Indexes	RWA (Ohm)	VO (%)	АT (s)	CT (s)
	Sitting A1	0.11	23.5	0.11	0.47	Sitting A	0.115	20.1	0.11	0.48
	Sitting A2	0.12	16.7	0.11	0.49	Horizontal A	0.08	6.65	0.09	0.285
	Horizontal A1	0.08	6.9	0.09	0.26	Horizontal B	0.085	3.95	0.1	0.605
	Horizontal A2	0.08	6.4	0.09	0.31	Sitting B	0.125	21.3	0.11	0.52
	Horizontal B1	0.08	6.1	0.11	0.62
	Horizontal B2	0.09	1.8	0.09	0.59
	Sitting B1	0.13	21	0.11	0.53
	Sitting B2	0.12	21.6	0.11	0.51

## Sheet: REG 2 Z. (m)
Left FM	Samples/Indexes	RWA (Ohm)	VO (%)	АT (s)	CT (s)	Body positions/Indexes	RWA (Ohm)	VO (%)	АT (s)	CT (s)
	Sitting A1	0.1	6.7	0.12	0.59	Sitting A	0.1	6.45	0.115	0.595
	Sitting A2	0.1	6.2	0.11	0.6	Horizontal A	0.13	3.05	0.1	0.795
	Horizontal A1	0.13	3	0.1	0.8	Horizontal B	0.115	3.9	0.1	0.785
	Horizontal A2	0.13	3.1	0.1	0.79	Sitting B	0.08	10.55	0.12	0.605
	Horizontal B1	0.11	4.6	0.1	0.79
	Horizontal B2	0.12	3.2	0.1	0.78
	Sitting B1	0.08	11.3	0.12	0.61
	Sitting B2	0.08	9.8	0.12	0.6
Right FM	Samples/Indexes	RWA (Ohm)	VO (%)	АT (s)	CT (s)	Body positions/Indexes	RWA (Ohm)	VO (%)	АT (s)	CT (s)
	Sitting A1	0.17	3.8	0.11	0.58	Sitting A	0.17	3.75	0.11	0.58
	Sitting A2	0.17	3.7	0.11	0.58	Horizontal A	0.2	3.25	0.1	0.775
	Horizontal A1	0.2	3.8	0.1	0.78	Horizontal B	0.175	6.8	0.1	0.78
	Horizontal A2	0.2	2.7	0.1	0.77	Sitting B	0.16	7.9	0.12	0.605
	Horizontal B1	0.17	6.9	0.1	0.77
	Horizontal B2	0.18	6.7	0.1	0.79
	Sitting B1	0.16	8	0.12	0.61
	Sitting B2	0.16	7.8	0.12	0.6
Left ОM	Samples/Indexes	RWA (Ohm)	VO (%)	АT (s)	CT (s)	Body positions/Indexes	RWA (Ohm)	VO (%)	АT (s)	CT (s)
	Sitting A1	0.1	6.2	0.11	0.59	Sitting A	0.1	5.25	0.11	0.575
	Sitting A2	0.1	4.3	0.11	0.56	Horizontal A	0.09	13.2	0.11	0.84
	Horizontal A1	0.09	14	0.11	0.84	Horizontal B	0.08	19.05	0.115	0.845
	Horizontal A2	0.09	12.4	0.11	0.84	Sitting B	0.11	3.95	0.11	0.59
	Horizontal B1	0.08	20.7	0.12	0.83
	Horizontal B2	0.08	17.4	0.11	0.86
	Sitting B1	0.11	7.8	0.11	0.59
	Sitting B2	0.11	0.1	0.11	0.59
Right ОM	Samples/Indexes	RWA (Ohm)	VO (%)	АT (s)	CT (s)	Body positions/Indexes	RWA (Ohm)	VO (%)	АT (s)	CT (s)
	Sitting A1	0.15	10	0.11	0.64	Sitting A	0.15	9.45	0.11	0.63
	Sitting A2	0.15	8.9	0.11	0.62	Horizontal A	0.125	8.7	0.1	0.83
	Horizontal A1	0.13	8.9	0.1	0.83	Horizontal B	0.11	12.55	0.1	0.82
	Horizontal A2	0.12	8.5	0.1	0.83	Sitting B	0.17	10.7	0.11	0.625
	Horizontal B1	0.11	13.1	0.1	0.8
	Horizontal B2	0.11	12	0.1	0.84
	Sitting B1	0.17	10.7	0.11	0.62
	Sitting B2	0.17	10.7	0.11	0.63

## Sheet: REG 3 K. (m)
Left FM	Samples/Indexes	RWA (Ohm)	VO (%)	АT (s)	CT (s)	Body positions/Indexes	RWA (Ohm)	VO (%)	АT (s)	CT (s)
	Sitting A1	0.1	8.3	0.1	0.56	Sitting A	0.1	8.85	0.1	0.565
	Sitting A2	0.1	9.4	0.1	0.57	Horizontal A	0.12	17.85	0.115	0.755
	Horizontal A1	0.12	17.6	0.11	0.75	Horizontal B	0.115	20.1	0.13	0.765
	Horizontal A2	0.12	18.1	0.12	0.76	Sitting B	0.075	9.3	0.1	0.61
	Horizontal B1	0.12	20.4	0.15	0.73
	Horizontal B2	0.11	19.8	0.11	0.8
	Sitting B1	0.07	11.7	0.1	0.61
	Sitting B2	0.08	6.9	0.1	0.61
Right FM	Samples/Indexes	RWA (Ohm)	VO (%)	АT (s)	CT (s)	Body positions/Indexes	RWA (Ohm)	VO (%)	АT (s)	CT (s)
	Sitting A1	0.11	13.8	0.1	0.56	Sitting A	0.11	15.25	0.1	0.565
	Sitting A2	0.11	16.7	0.1	0.57	Horizontal A	0.13	19.15	0.115	0.755
	Horizontal A1	0.13	19.5	0.11	0.75	Horizontal B	0.125	20.05	0.125	0.76
	Horizontal A2	0.13	18.8	0.12	0.76	Sitting B	0.09	14.65	0.11	0.615
	Horizontal B1	0.13	20.2	0.14	0.73
	Horizontal B2	0.12	19.9	0.11	0.79
	Sitting B1	0.08	16.5	0.12	0.62
	Sitting B2	0.1	12.8	0.1	0.61
Left ОM	Samples/Indexes	RWA (Ohm)	VO (%)	АT (s)	CT (s)	Body positions/Indexes	RWA (Ohm)	VO (%)	АT (s)	CT (s)
	Sitting A1	0.13	1.8	0.09	0.52	Sitting A	0.13	2.1	0.095	0.52
	Sitting A2	0.13	2.4	0.1	0.52	Horizontal A	0.11	3.05	0.1	0.61
	Horizontal A1	0.11	4.5	0.1	0.61	Horizontal B	0.105	4.35	0.1	0.63
	Horizontal A2	0.11	1.6	0.1	0.61	Sitting B	0.125	0.8	0.09	0.585
	Horizontal B1	0.11	7.6	0.1	0.63
	Horizontal B2	0.1	1.1	0.1	0.63
	Sitting B1	0.12	1.5	0.09	0.58
	Sitting B2	0.13	0.1	0.09	0.59
Right ОM	Samples/Indexes	RWA (Ohm)	VO (%)	АT (s)	CT (s)	Body positions/Indexes	RWA (Ohm)	VO (%)	АT (s)	CT (s)
	Sitting A1	0.1	12.6	0.1	0.56	Sitting A	0.1	11.05	0.1	0.55
	Sitting A2	0.1	9.5	0.1	0.54	Horizontal A	0.09	6.3	0.09	0.725
	Horizontal A1	0.09	7.5	0.09	0.71	Horizontal B	0.09	4.4	0.09	0.71
	Horizontal A2	0.09	5.1	0.09	0.74	Sitting B	0.075	3.5	0.09	0.595
	Horizontal B1	0.09	6.2	0.09	0.71
	Horizontal B2	0.09	2.6	0.09	0.71
	Sitting B1	0.07	3.4	0.09	0.6
	Sitting B2	0.08	3.6	0.09	0.59

## Sheet: REG 4 L. (m)
Left FM	Samples/Indexes	RWA (Ohm)	VO (%)	АT (s)	CT (s)	Body positions/Indexes	RWA (Ohm)	VO (%)	АT (s)	CT (s)
	Sitting A1	0.15	8.6	0.1	0.65	Sitting A	0.15	8.3	0.1	0.665
	Sitting A2	0.15	8	0.1	0.68	Horizontal A	0.16	14.6	0.11	0.83
	Horizontal A1	0.16	14.4	0.11	0.86	Horizontal B	0.145	17.05	0.11	0.775
	Horizontal A2	0.16	14.8	0.11	0.8	Sitting B	0.12	9.05	0.105	0.64
	Horizontal B1	0.15	17.1	0.11	0.8
	Horizontal B2	0.14	17	0.11	0.75
	Sitting B1	0.12	9.1	0.1	0.6
	Sitting B2	0.12	9	0.11	0.68
Right FM	Samples/Indexes	RWA (Ohm)	VO (%)	АT (s)	CT (s)	Body positions/Indexes	RWA (Ohm)	VO (%)	АT (s)	CT (s)
	Sitting A1	0.17	5.2	0.11	0.64	Sitting A	0.17	5.1	0.11	0.66
	Sitting A2	0.17	5	0.11	0.68	Horizontal A	0.23	14	0.115	0.835
	Horizontal A1	0.23	14.8	0.11	0.87	Horizontal B	0.205	15.25	0.11	0.775
	Horizontal A2	0.23	13.2	0.12	0.8	Sitting B	0.12	6.65	0.105	0.635
	Horizontal B1	0.21	14.4	0.11	0.8
	Horizontal B2	0.2	16.1	0.11	0.75
	Sitting B1	0.12	6.5	0.1	0.6
	Sitting B2	0.12	6.8	0.11	0.67
Left ОM	Samples/Indexes	RWA (Ohm)	VO (%)	АT (s)	CT (s)	Body positions/Indexes	RWA (Ohm)	VO (%)	АT (s)	CT (s)
	Sitting A1	0.12	13.7	0.1	0.67	Sitting A	0.125	12.65	0.1	0.685
	Sitting A2	0.13	11.6	0.1	0.7	Horizontal A	0.145	3.6	0.11	0.81
	Horizontal A1	0.14	3.8	0.11	0.84	Horizontal B	0.14	3.7	0.105	0.755
	Horizontal A2	0.15	3.4	0.11	0.78	Sitting B	0.125	5.3	0.095	0.655
	Horizontal B1	0.14	3.4	0.11	0.78
	Horizontal B2	0.14	4	0.1	0.73
	Sitting B1	0.12	10.5	0.09	0.62
	Sitting B2	0.13	0.1	0.1	0.69
Right ОM	Samples/Indexes	RWA (Ohm)	VO (%)	АT (s)	CT (s)	Body positions/Indexes	RWA (Ohm)	VO (%)	АT (s)	CT (s)
	Sitting A1	0.13	10.6	0.12	0.65	Sitting A	0.135	9.2	0.12	0.665
	Sitting A2	0.14	7.8	0.12	0.68	Horizontal A	0.23	8.3	0.11	0.79
	Horizontal A1	0.23	9.2	0.11	0.82	Horizontal B	0.215	8.9	0.11	0.725
	Horizontal A2	0.23	7.4	0.11	0.76	Sitting B	0.135	8.75	0.105	0.655
	Horizontal B1	0.22	8.2	0.11	0.75
	Horizontal B2	0.21	9.6	0.11	0.7
	Sitting B1	0.13	9.3	0.1	0.62
	Sitting B2	0.14	8.2	0.11	0.69

## Sheet: REG 5 D. (m)
Left FM	Samples/Indexes	RWA (Ohm)	VO (%)	АT (s)	CT (s)	Body positions/Indexes	RWA (Ohm)	VO (%)	АT (s)	CT (s)
	Sitting A1	0.08	8.8	0.12	0.5	Sitting A	0.08	8.9	0.12	0.505
	Sitting A2	0.08	9	0.12	0.51	Horizontal A	0.14	14.15	0.135	0.67
	Horizontal A1	0.15	16.2	0.14	0.69	Horizontal B	0.13	15.85	0.14	0.655
	Horizontal A2	0.13	12.1	0.13	0.65	Sitting B	0.075	9.6	0.12	0.52
	Horizontal B1	0.13	16.4	0.14	0.64
	Horizontal B2	0.13	15.3	0.14	0.67
	Sitting B1	0.08	9	0.12	0.53
	Sitting B2	0.07	10.2	0.12	0.51
Right FM	Samples/Indexes	RWA (Ohm)	VO (%)	АT (s)	CT (s)	Body positions/Indexes	RWA (Ohm)	VO (%)	АT (s)	CT (s)
	Sitting A1	0.11	10.1	0.13	0.51	Sitting A	0.11	10.05	0.13	0.515
	Sitting A2	0.11	10	0.13	0.52	Horizontal A	0.175	16	0.145	0.675
	Horizontal A1	0.19	15.7	0.15	0.68	Horizontal B	0.165	15.75	0.14	0.655
	Horizontal A2	0.16	16.3	0.14	0.67	Sitting B	0.095	12.25	0.13	0.535
	Horizontal B1	0.17	16.1	0.14	0.64
	Horizontal B2	0.16	15.4	0.14	0.67
	Sitting B1	0.1	11.4	0.13	0.55
	Sitting B2	0.09	13.1	0.13	0.52
Left ОM	Samples/Indexes	RWA (Ohm)	VO (%)	АT (s)	CT (s)	Body positions/Indexes	RWA (Ohm)	VO (%)	АT (s)	CT (s)
	Sitting A1	0.08	7.4	0.11	0.5	Sitting A	0.075	7.2	0.11	0.495
	Sitting A2	0.07	7	0.11	0.49	Horizontal A	0.09	19.9	0.115	0.7
	Horizontal A1	0.09	19	0.12	0.71	Horizontal B	0.085	20.4	0.125	0.69
	Horizontal A2	0.09	20.8	0.11	0.69	Sitting B	0.085	2.15	0.11	0.515
	Horizontal B1	0.09	23.4	0.12	0.68
	Horizontal B2	0.08	17.4	0.13	0.7
	Sitting B1	0.09	4.2	0.11	0.51
	Sitting B2	0.08	0.1	0.11	0.52
Right ОM	Samples/Indexes	RWA (Ohm)	VO (%)	АT (s)	CT (s)	Body positions/Indexes	RWA (Ohm)	VO (%)	АT (s)	CT (s)
	Sitting A1	0.07	11.6	0.1	0.51	Sitting A	0.07	10.5	0.1	0.505
	Sitting A2	0.07	9.4	0.1	0.5	Horizontal A	0.08	28.7	0.105	0.73
	Horizontal A1	0.09	27.3	0.11	0.73	Horizontal B	0.07	30	0.11	0.72
	Horizontal A2	0.07	30.1	0.1	0.73	Sitting B	0.08	6.35	0.1	0.51
	Horizontal B1	0.07	29.8	0.11	0.7
	Horizontal B2	0.07	30.2	0.11	0.74
	Sitting B1	0.08	3.8	0.1	0.51
	Sitting B2	0.08	8.9	0.1	0.51

## Sheet: REG 6 R. (m)
Left FM	Samples/Indexes	RWA (Ohm)	VO (%)	АT (s)	CT (s)	Body positions/Indexes	RWA (Ohm)	VO (%)	АT (s)	CT (s)
	Sitting A1	0.11	5.1	0.12	0.52	Sitting A	0.105	3.9	0.115	0.485
	Sitting A2	0.1	2.7	0.11	0.45	Horizontal A	0.175	12.3	0.125	0.695
	Horizontal A1	0.18	9.4	0.12	0.68	Horizontal B	0.18	14.5	0.135	0.72
	Horizontal A2	0.17	15.2	0.13	0.71	Sitting B	0.1	4.9	0.12	0.455
	Horizontal B1	0.18	12.3	0.13	0.73
	Horizontal B2	0.18	16.7	0.14	0.71
	Sitting B1	0.1	4.6	0.12	0.43
	Sitting B2	0.1	5.2	0.12	0.48
Right FM	Samples/Indexes	RWA (Ohm)	VO (%)	АT (s)	CT (s)	Body positions/Indexes	RWA (Ohm)	VO (%)	АT (s)	CT (s)
	Sitting A1	0.09	11.2	0.12	0.56	Sitting A	0.09	9.15	0.115	0.525
	Sitting A2	0.09	7.1	0.11	0.49	Horizontal A	0.135	16.05	0.115	0.71
	Horizontal A1	0.14	16.4	0.11	0.7	Horizontal B	0.13	17.2	0.115	0.725
	Horizontal A2	0.13	15.7	0.12	0.72	Sitting B	0.09	6.8	0.11	0.46
	Horizontal B1	0.13	17	0.11	0.74
	Horizontal B2	0.13	17.4	0.12	0.71
	Sitting B1	0.09	6.7	0.11	0.43
	Sitting B2	0.09	6.9	0.11	0.49
Left ОM	Samples/Indexes	RWA (Ohm)	VO (%)	АT (s)	CT (s)	Body positions/Indexes	RWA (Ohm)	VO (%)	АT (s)	CT (s)
	Sitting A1	0.14	1.4	0.11	0.5	Sitting A	0.135	1.75	0.105	0.475
	Sitting A2	0.13	2.1	0.1	0.45	Horizontal A	0.135	6.35	0.12	0.65
	Horizontal A1	0.12	8.4	0.12	0.66	Horizontal B	0.155	13.2	0.125	0.715
	Horizontal A2	0.15	4.3	0.12	0.64	Sitting B	0.155	0.8	0.105	0.42
	Horizontal B1	0.11	9	0.13	0.72
	Horizontal B2	0.2	17.4	0.12	0.71
	Sitting B1	0.15	1.5	0.1	0.4
	Sitting B2	0.16	0.1	0.11	0.44
Right ОM	Samples/Indexes	RWA (Ohm)	VO (%)	АT (s)	CT (s)	Body positions/Indexes	RWA (Ohm)	VO (%)	АT (s)	CT (s)
	Sitting A1	0.12	5.7	0.1	0.53	Sitting A	0.12	5.35	0.1	0.5
	Sitting A2	0.12	5	0.1	0.47	Horizontal A	0.175	9.1	0.11	0.665
	Horizontal A1	0.18	12.9	0.11	0.67	Horizontal B	0.08	2.9	0.1	0.635
	Horizontal A2	0.17	5.3	0.11	0.66	Sitting B	0.13	6.4	0.1	0.45
	Horizontal B1	0.08	3.6	0.1	0.64
	Horizontal B2	0.08	2.2	0.1	0.63
	Sitting B1	0.13	8.5	0.1	0.43
	Sitting B2	0.13	4.3	0.1	0.47

## Sheet: REG 7 M. (m)
Left FM	Samples/Indexes	RWA (Ohm)	VO (%)	АT (s)	CT (s)	Body positions/Indexes	RWA (Ohm)	VO (%)	АT (s)	CT (s)
	Sitting A1	0.2	4.2	0.12	0.63	Sitting A	0.205	4.2	0.12	0.62
	Sitting A2	0.21	4.2	0.12	0.61	Horizontal A	0.22	12.3	0.115	0.735
	Horizontal A1	0.21	6.6	0.11	0.74	Horizontal B	0.195	14.25	0.11	0.745
	Horizontal A2	0.23	18	0.12	0.73	Sitting B	0.205	3.9	0.11	0.57
	Horizontal B1	0.2	12.7	0.11	0.75
	Horizontal B2	0.19	15.8	0.11	0.74
	Sitting B1	0.21	3.5	0.11	0.56
	Sitting B2	0.2	4.3	0.11	0.58
Right FM	Samples/Indexes	RWA (Ohm)	VO (%)	АT (s)	CT (s)	Body positions/Indexes	RWA (Ohm)	VO (%)	АT (s)	CT (s)
	Sitting A1	0.15	13.9	0.11	0.66	Sitting A	0.15	12.2	0.11	0.645
	Sitting A2	0.15	10.5	0.11	0.63	Horizontal A	0.15	10.05	0.1	0.755
	Horizontal A1	0.15	5.7	0.1	0.75	Horizontal B	0.14	3.45	0.1	0.745
	Horizontal A2	0.15	14.4	0.1	0.76	Sitting B	0.135	7.7	0.1	0.605
	Horizontal B1	0.15	3.3	0.1	0.75
	Horizontal B2	0.13	3.6	0.1	0.74
	Sitting B1	0.13	5.1	0.1	0.6
	Sitting B2	0.14	10.3	0.1	0.61
Left ОM	Samples/Indexes	RWA (Ohm)	VO (%)	АT (s)	CT (s)	Body positions/Indexes	RWA (Ohm)	VO (%)	АT (s)	CT (s)
	Sitting A1	0.18	4.3	0.11	0.65	Sitting A	0.185	4.5	0.11	0.63
	Sitting A2	0.19	4.7	0.11	0.61	Horizontal A	0.18	4.3	0.105	0.72
	Horizontal A1	0.17	4.3	0.1	0.72	Horizontal B	0.16	3.6	0.1	0.725
	Horizontal A2	0.19	4.3	0.11	0.72	Sitting B	0.175	1.85	0.105	0.56
	Horizontal B1	0.16	3.3	0.1	0.72
	Horizontal B2	0.16	3.9	0.1	0.73
	Sitting B1	0.17	3.6	0.1	0.56
	Sitting B2	0.18	0.1	0.11	0.56
Right ОM	Samples/Indexes	RWA (Ohm)	VO (%)	АT (s)	CT (s)	Body positions/Indexes	RWA (Ohm)	VO (%)	АT (s)	CT (s)
	Sitting A1	0.2	15.8	0.1	0.68	Sitting A	0.2	14.5	0.1	0.66
	Sitting A2	0.2	13.2	0.1	0.64	Horizontal A	0.135	29.9	0.13	0.42
	Horizontal A1	0.07	1.2	0.07	0.28	Horizontal B	0.235	30.3	0.1	0.78
	Horizontal A2	0.2	58.6	0.19	0.56	Sitting B	0.22	8.4	0.095	0.59
	Horizontal B1	0.23	30.5	0.1	0.78
	Horizontal B2	0.24	30.1	0.1	0.78
	Sitting B1	0.21	6.6	0.09	0.59
	Sitting B2	0.23	10.2	0.1	0.59

## Sheet: REG 8 Zh. (m)
Left FM	Samples/Indexes	RWA (Ohm)	VO (%)	АT (s)	CT (s)	Body positions/Indexes	RWA (Ohm)	VO (%)	АT (s)	CT (s)
	Sitting A1	0.12	4.7	0.1	0.57	Sitting A	0.12	7.6	0.105	0.565
	Sitting A2	0.12	10.5	0.11	0.56	Horizontal A	0.135	19.35	0.1	0.65
	Horizontal A1	0.13	20.2	0.1	0.64	Horizontal B	0.115	18.85	0.1	0.675
	Horizontal A2	0.14	18.5	0.1	0.66	Sitting B	0.115	5	0.095	0.54
	Horizontal B1	0.12	19.4	0.1	0.67
	Horizontal B2	0.11	18.3	0.1	0.68
	Sitting B1	0.12	5	0.1	0.56
	Sitting B2	0.11	5	0.09	0.52
Right FM	Samples/Indexes	RWA (Ohm)	VO (%)	АT (s)	CT (s)	Body positions/Indexes	RWA (Ohm)	VO (%)	АT (s)	CT (s)
	Sitting A1	0.09	4.4	0.09	0.59	Sitting A	0.09	5.75	0.095	0.57
	Sitting A2	0.09	7.1	0.1	0.55	Horizontal A	0.11	18.95	0.11	0.64
	Horizontal A1	0.11	21	0.11	0.63	Horizontal B	0.1	18.5	0.11	0.67
	Horizontal A2	0.11	16.9	0.11	0.65	Sitting B	0.085	6.05	0.085	0.555
	Horizontal B1	0.1	20.3	0.11	0.67
	Horizontal B2	0.1	16.7	0.11	0.67
	Sitting B1	0.09	5.4	0.09	0.58
	Sitting B2	0.08	6.7	0.08	0.53
Left ОM	Samples/Indexes	RWA (Ohm)	VO (%)	АT (s)	CT (s)	Body positions/Indexes	RWA (Ohm)	VO (%)	АT (s)	CT (s)
	Sitting A1	0.09	3.8	0.09	0.58	Sitting A	0.09	4.4	0.09	0.565
	Sitting A2	0.09	5	0.09	0.55	Horizontal A	0.09	27.05	0.1	0.66
	Horizontal A1	0.09	28.6	0.1	0.64	Horizontal B	0.08	27.5	0.095	0.705
	Horizontal A2	0.09	25.5	0.1	0.68	Sitting B	0.095	1.4	0.09	0.53
	Horizontal B1	0.08	27.2	0.1	0.7
	Horizontal B2	0.08	27.8	0.09	0.71
	Sitting B1	0.1	2.7	0.09	0.55
	Sitting B2	0.09	0.1	0.09	0.51
Right ОM	Samples/Indexes	RWA (Ohm)	VO (%)	АT (s)	CT (s)	Body positions/Indexes	RWA (Ohm)	VO (%)	АT (s)	CT (s)
	Sitting A1	0.07	2.1	0.08	0.57	Sitting A	0.07	2.3	0.08	0.555
	Sitting A2	0.07	2.5	0.08	0.54	Horizontal A	0.11	8	0.11	0.55
	Horizontal A1	0.11	11.8	0.11	0.58	Horizontal B	0.11	5.35	0.11	0.585
	Horizontal A2	0.11	4.2	0.11	0.52	Sitting B	0.085	1.6	0.085	0.505
	Horizontal B1	0.11	7.4	0.11	0.59
	Horizontal B2	0.11	3.3	0.11	0.58
	Sitting B1	0.09	1.4	0.09	0.53
	Sitting B2	0.08	1.8	0.08	0.48

## Sheet: REG 9 S. (m)
Left FM	Samples/Indexes	RWA (Ohm)	VO (%)	АT (s)	CT (s)	Body positions/Indexes	RWA (Ohm)	VO (%)	АT (s)	CT (s)
	Sitting A1	0.09	7.9	0.13	0.73	Sitting A	0.085	6.85	0.13	0.67
	Sitting A2	0.08	5.8	0.13	0.61	Horizontal A	0.115	9.15	0.16	0.98
	Horizontal A1	0.11	9.3	0.16	0.99	Horizontal B	0.105	10.85	0.14	0.995
	Horizontal A2	0.12	9	0.16	0.97	Sitting B	0.08	7.1	0.13	0.63
	Horizontal B1	0.11	10.6	0.14	1.03
	Horizontal B2	0.1	11.1	0.14	0.96
	Sitting B1	0.08	7.2	0.13	0.65
	Sitting B2	0.08	7	0.13	0.61
Right FM	Samples/Indexes	RWA (Ohm)	VO (%)	АT (s)	CT (s)	Body positions/Indexes	RWA (Ohm)	VO (%)	АT (s)	CT (s)
	Sitting A1	0.1	8	0.13	0.76	Sitting A	0.09	8.25	0.125	0.705
	Sitting A2	0.08	8.5	0.12	0.65	Horizontal A	0.09	14.1	0.12	1.045
	Horizontal A1	0.09	14.1	0.11	1.05	Horizontal B	0.085	16.3	0.11	1.04
	Horizontal A2	0.09	14.1	0.13	1.04	Sitting B	0.09	7.1	0.11	0.66
	Horizontal B1	0.09	16.4	0.11	1.07
	Horizontal B2	0.08	16.2	0.11	1.01
	Sitting B1	0.09	7.4	0.11	0.68
	Sitting B2	0.09	6.8	0.11	0.64
Left ОM	Samples/Indexes	RWA (Ohm)	VO (%)	АT (s)	CT (s)	Body positions/Indexes	RWA (Ohm)	VO (%)	АT (s)	CT (s)
	Sitting A1	0.12	9.9	0.12	0.77	Sitting A	0.11	8.55	0.12	0.7
	Sitting A2	0.1	7.2	0.12	0.63	Horizontal A	0.12	4.2	0.12	0.95
	Horizontal A1	0.12	4.1	0.12	0.95	Horizontal B	0.11	3.1	0.11	0.935
	Horizontal A2	0.12	4.3	0.12	0.95	Sitting B	0.12	5.75	0.12	0.68
	Horizontal B1	0.11	2	0.11	0.97
	Horizontal B2	0.11	4.2	0.11	0.9
	Sitting B1	0.12	11.4	0.12	0.7
	Sitting B2	0.12	0.1	0.12	0.66
Right ОM	Samples/Indexes	RWA (Ohm)	VO (%)	АT (s)	CT (s)	Body positions/Indexes	RWA (Ohm)	VO (%)	АT (s)	CT (s)
	Sitting A1	0.14	8.7	0.11	0.75	Sitting A	0.135	7.45	0.11	0.695
	Sitting A2	0.13	6.2	0.11	0.64	Horizontal A	0.065	2.25	0.115	0.915
	Horizontal A1	0.07	2.3	0.12	0.94	Horizontal B	0.06	1.9	0.11	0.885
	Horizontal A2	0.06	2.2	0.11	0.89	Sitting B	0.125	6.65	0.11	0.65
	Horizontal B1	0.06	1.3	0.11	0.87
	Horizontal B2	0.06	2.5	0.11	0.9
	Sitting B1	0.13	7.3	0.11	0.68
	Sitting B2	0.12	6	0.11	0.62

## Sheet: REG 10 S. (m)
Left FM	Samples/Indexes	RWA (Ohm)	VO (%)	АT (s)	CT (s)	Body positions/Indexes	RWA (Ohm)	VO (%)	АT (s)	CT (s)
	Sitting A1	0.09	7.4	0.14	0.72	Sitting A	0.085	7.45	0.135	0.715
	Sitting A2	0.08	7.5	0.13	0.71	Horizontal A	0.1	14.3	0.12	0.94
	Horizontal A1	0.1	15.5	0.12	0.95	Horizontal B	0.09	13.8	0.11	0.945
	Horizontal A2	0.1	13.1	0.12	0.93	Sitting B	0.065	9.25	0.125	0.685
	Horizontal B1	0.09	14.8	0.11	0.95
	Horizontal B2	0.09	12.8	0.11	0.94
	Sitting B1	0.06	9	0.12	0.69
	Sitting B2	0.07	9.5	0.13	0.68
Right FM	Samples/Indexes	RWA (Ohm)	VO (%)	АT (s)	CT (s)	Body positions/Indexes	RWA (Ohm)	VO (%)	АT (s)	CT (s)
	Sitting A1	0.1	8	0.14	0.71	Sitting A	0.095	7.75	0.14	0.715
	Sitting A2	0.09	7.5	0.14	0.72	Horizontal A	0.115	10.65	0.125	0.92
	Horizontal A1	0.11	12.4	0.13	0.93	Horizontal B	0.1	8.1	0.11	0.895
	Horizontal A2	0.12	8.9	0.12	0.91	Sitting B	0.075	9.75	0.135	0.715
	Horizontal B1	0.1	8	0.11	0.9
	Horizontal B2	0.1	8.2	0.11	0.89
	Sitting B1	0.07	11.1	0.12	0.73
	Sitting B2	0.08	8.4	0.15	0.7
Left ОM	Samples/Indexes	RWA (Ohm)	VO (%)	АT (s)	CT (s)	Body positions/Indexes	RWA (Ohm)	VO (%)	АT (s)	CT (s)
	Sitting A1	0.09	9.7	0.11	0.76	Sitting A	0.09	8.8	0.11	0.755
	Sitting A2	0.09	7.9	0.11	0.75	Horizontal A	0.11	9.8	0.115	0.95
	Horizontal A1	0.11	13.3	0.12	0.95	Horizontal B	0.09	6.5	0.11	0.925
	Horizontal A2	0.11	6.3	0.11	0.95	Sitting B	0.09	1.7	0.1	0.725
	Horizontal B1	0.09	6	0.11	0.96
	Horizontal B2	0.09	7	0.11	0.89
	Sitting B1	0.09	3.3	0.1	0.72
	Sitting B2	0.09	0.1	0.1	0.73
Right ОM	Samples/Indexes	RWA (Ohm)	VO (%)	АT (s)	CT (s)	Body positions/Indexes	RWA (Ohm)	VO (%)	АT (s)	CT (s)
	Sitting A1	0.07	11.7	0.14	0.75	Sitting A	0.07	10.55	0.14	0.745
	Sitting A2	0.07	9.4	0.14	0.74	Horizontal A	0.12	7.4	0.12	0.89
	Horizontal A1	0.11	8.8	0.12	0.88	Horizontal B	0.105	4.95	0.115	0.875
	Horizontal A2	0.13	6	0.12	0.9	Sitting B	0.07	13.5	0.11	0.745
	Horizontal B1	0.11	5.5	0.12	0.89
	Horizontal B2	0.1	4.4	0.11	0.86
	Sitting B1	0.07	13.8	0.11	0.75
	Sitting B2	0.07	13.2	0.11	0.74

[truncated: 63 more sheets: REG 11 Zh. (m), REG 12 K. (m), REG 13 S. (m), REG 14 G. (m), REG 15 K. (m), REG 16 H. (m), REG 17 P. (m), REG 18 S. (m), REG 19 Sh. (m), REG 20 M. (m), EEG 1 G. (m), EEG 2 Z. (m), EEG 3 K. (m), EEG 4 L. (m), EEG 5 D. (m), EEG 6 R. (m), EEG 7 M. (m), EEG 8 Zh. (m), EEG 9 S. (m), EEG 10 S. (m) …]
