# Supplementary material for: The role of cerebral blood flow volume in cortical inhibition during postural changes
Source: PeerJ. 2025 Oct 27;13:e20233. doi: 10.7717/peerj.20233 (PMC12574591; doi:10.7717/peerj.20233)
Supplement: Supplemental Information 74 [file peerj-13-20233-s074.xlsx]

## Sheet: REG 1 G. (m)
Left FM	Samples/Indexes	RWA (Ohm)	VO (%)	АT (s)	CT (s)	Body positions/Indexes	RWA (Ohm)	VO (%)	АT (s)	CT (s)
	oscillatory Sitting A1	0.1	9.7	0.09	0.61	oscillatory Sitting A	0.1	9.5	0.095	0.6
	oscillatory Sitting A2	0.1	9.3	0.1	0.59	oscillatory Horizontal A	0.115	15.7	0.105	0.725
	oscillatory Horizontal A1	0.12	10.4	0.11	0.71	oscillatory Horizontal B	0.09	22.2	0.11	0.73
	oscillatory Horizontal A2	0.11	21	0.1	0.74	oscillatory Sitting B	0.095	4.7	0.09	0.55
	oscillatory Horizontal B1	0.09	22.2	0.11	0.73
	oscillatory Horizontal B2	0.09	22.2	0.11	0.73
	oscillatory Sitting B1	0.1	4.1	0.09	0.54
	oscillatory Sitting B2	0.09	5.3	0.09	0.56
Right FM	Samples/Indexes	RWA (Ohm)	VO (%)	АT (s)	CT (s)	Body positions/Indexes	RWA (Ohm)	VO (%)	АT (s)	CT (s)
	oscillatory Sitting A1	0.08	10.4	0.11	0.6	oscillatory Sitting A	0.08	11.6	0.11	0.585
	oscillatory Sitting A2	0.08	12.8	0.11	0.57	oscillatory Horizontal A	0.14	12.05	0.225	0.65
	oscillatory Horizontal A1	0.14	12.8	0.22	0.65	oscillatory Horizontal B	0.11	11	0.235	0.64
	oscillatory Horizontal A2	0.14	11.3	0.23	0.65	oscillatory Sitting B	0.085	13.65	0.115	0.53
	oscillatory Horizontal B1	0.11	11.3	0.23	0.64
	oscillatory Horizontal B2	0.11	10.7	0.24	0.64
	oscillatory Sitting B1	0.09	14.4	0.11	0.52
	oscillatory Sitting B2	0.08	12.9	0.12	0.54
Left ОM	Samples/Indexes	RWA (Ohm)	VO (%)	АT (s)	CT (s)	Body positions/Indexes	RWA (Ohm)	VO (%)	АT (s)	CT (s)
	oscillatory Sitting A1	0.1	4.9	0.09	0.6	oscillatory Sitting A	0.095	8.3	0.09	0.59
	oscillatory Sitting A2	0.09	11.7	0.09	0.58	oscillatory Horizontal A	0.085	15.5	0.09	0.705
	oscillatory Horizontal A1	0.09	15.9	0.09	0.71	oscillatory Horizontal B	0.09	18.45	0.095	0.72
	oscillatory Horizontal A2	0.08	15.1	0.09	0.7	oscillatory Sitting B	0.095	4.3	0.09	0.56
	oscillatory Horizontal B1	0.09	20	0.1	0.72
	oscillatory Horizontal B2	0.09	16.9	0.09	0.72
	oscillatory Sitting B1	0.1	3.7	0.09	0.55
	oscillatory Sitting B2	0.09	4.9	0.09	0.57
Right ОM	Samples/Indexes	RWA (Ohm)	VO (%)	АT (s)	CT (s)	Body positions/Indexes	RWA (Ohm)	VO (%)	АT (s)	CT (s)
	oscillatory Sitting A1	0.08	6.6	0.09	0.6	oscillatory Sitting A	0.08	5.3	0.09	0.585
	oscillatory Sitting A2	0.08	4	0.09	0.57	oscillatory Horizontal A	0.06	19.3	0.14	0.7
	oscillatory Horizontal A1	0.06	17.9	0.14	0.71	oscillatory Horizontal B	0.05	17.1	0.115	0.695
	oscillatory Horizontal A2	0.06	20.7	0.14	0.69	oscillatory Sitting B	0.075	4.65	0.09	0.56
	oscillatory Horizontal B1	0.05	12.6	0.13	0.65
	oscillatory Horizontal B2	0.05	21.6	0.1	0.74
	oscillatory Sitting B1	0.08	4.8	0.09	0.55
	oscillatory Sitting B2	0.07	4.5	0.09	0.57

## Sheet: REG 2 Z. (m)
Left FM	Samples/Indexes	RWA (Ohm)	VO (%)	АT (s)	CT (s)	Body positions/Indexes	RWA (Ohm)	VO (%)	АT (s)	CT (s)
	oscillatory Sitting A1	0.14	4.7	0.1	0.57	oscillatory Sitting A	0.14	4.65	0.1	0.575
	oscillatory Sitting A2	0.14	4.6	0.1	0.58	oscillatory Horizontal A	0.205	9.45	0.11	0.77
	oscillatory Horizontal A1	0.21	10.3	0.11	0.77	oscillatory Horizontal B	0.16	11.1	0.11	0.72
	oscillatory Horizontal A2	0.2	8.6	0.11	0.77	oscillatory Sitting B	0.14	11.4	0.11	0.62
	oscillatory Horizontal B1	0.16	11.7	0.11	0.72
	oscillatory Horizontal B2	0.16	10.5	0.11	0.72
	oscillatory Sitting B1	0.14	12.8	0.11	0.62
	oscillatory Sitting B2	0.14	10	0.11	0.62
Right FM	Samples/Indexes	RWA (Ohm)	VO (%)	АT (s)	CT (s)	Body positions/Indexes	RWA (Ohm)	VO (%)	АT (s)	CT (s)
	oscillatory Sitting A1	0.13	1.4	0.1	0.5	oscillatory Sitting A	0.135	0.75	0.1	0.51
	oscillatory Sitting A2	0.14	0.1	0.1	0.52	oscillatory Horizontal A	0.195	2.2	0.1	0.725
	oscillatory Horizontal A1	0.2	2	0.1	0.72	oscillatory Horizontal B	0.155	2.7	0.1	0.69
	oscillatory Horizontal A2	0.19	2.4	0.1	0.73	oscillatory Sitting B	0.135	1	0.11	0.54
	oscillatory Horizontal B1	0.15	2.4	0.1	0.69
	oscillatory Horizontal B2	0.16	3	0.1	0.69
	oscillatory Sitting B1	0.13	1.4	0.11	0.54
	oscillatory Sitting B2	0.14	0.6	0.11	0.54
Left ОM	Samples/Indexes	RWA (Ohm)	VO (%)	АT (s)	CT (s)	Body positions/Indexes	RWA (Ohm)	VO (%)	АT (s)	CT (s)
	oscillatory Sitting A1	0.14	4.5	0.11	0.55	oscillatory Sitting A	0.14	4.1	0.11	0.555
	oscillatory Sitting A2	0.14	3.7	0.11	0.56	oscillatory Horizontal A	0.23	9.45	0.12	0.77
	oscillatory Horizontal A1	0.24	10.1	0.12	0.77	oscillatory Horizontal B	0.17	9.25	0.11	0.735
	oscillatory Horizontal A2	0.22	8.8	0.12	0.77	oscillatory Sitting B	0.16	4.2	0.11	0.57
	oscillatory Horizontal B1	0.17	9.3	0.11	0.74
	oscillatory Horizontal B2	0.17	9.2	0.11	0.73
	oscillatory Sitting B1	0.16	4	0.11	0.56
	oscillatory Sitting B2	0.16	4.4	0.11	0.58
Right ОM	Samples/Indexes	RWA (Ohm)	VO (%)	АT (s)	CT (s)	Body positions/Indexes	RWA (Ohm)	VO (%)	АT (s)	CT (s)
	oscillatory Sitting A1	0.13	2.5	0.11	0.54	oscillatory Sitting A	0.13	2.55	0.11	0.545
	oscillatory Sitting A2	0.13	2.6	0.11	0.55	oscillatory Horizontal A	0.14	12.3	0.11	0.77
	oscillatory Horizontal A1	0.14	12.2	0.11	0.77	oscillatory Horizontal B	0.13	13.25	0.115	0.72
	oscillatory Horizontal A2	0.14	12.4	0.11	0.77	oscillatory Sitting B	0.145	2.2	0.115	0.54
	oscillatory Horizontal B1	0.13	13	0.11	0.72
	oscillatory Horizontal B2	0.13	13.5	0.12	0.72
	oscillatory Sitting B1	0.14	2	0.11	0.53
	oscillatory Sitting B2	0.15	2.4	0.12	0.55

## Sheet: REG 3 L. (m)
Left FM	Samples/Indexes	RWA (Ohm)	VO (%)	АT (s)	CT (s)	Body positions/Indexes	RWA (Ohm)	VO (%)	АT (s)	CT (s)
	oscillatory Sitting A1	0.15	5.3	0.1	0.6	oscillatory Sitting A	0.155	5.35	0.105	0.63
	oscillatory Sitting A2	0.16	5.4	0.11	0.66	oscillatory Horizontal A	0.165	7.1	0.11	0.85
	oscillatory Horizontal A1	0.17	6.8	0.11	0.82	oscillatory Horizontal B	0.16	11.4	0.11	0.785
	oscillatory Horizontal A2	0.16	7.4	0.11	0.88	oscillatory Sitting B	0.13	5.75	0.1	0.59
	oscillatory Horizontal B1	0.16	7	0.11	0.78
	oscillatory Horizontal B2	0.16	15.8	0.11	0.79
	oscillatory Sitting B1	0.13	6.2	0.1	0.58
	oscillatory Sitting B2	0.13	5.3	0.1	0.6
Right FM	Samples/Indexes	RWA (Ohm)	VO (%)	АT (s)	CT (s)	Body positions/Indexes	RWA (Ohm)	VO (%)	АT (s)	CT (s)
	oscillatory Sitting A1	0.24	5.2	0.1	0.57	oscillatory Sitting A	0.25	4.85	0.1	0.595
	oscillatory Sitting A2	0.26	4.5	0.1	0.62	oscillatory Horizontal A	0.26	7.35	0.11	0.825
	oscillatory Horizontal A1	0.26	7.6	0.11	0.81	oscillatory Horizontal B	0.245	8.45	0.11	0.755
	oscillatory Horizontal A2	0.26	7.1	0.11	0.84	oscillatory Sitting B	0.205	7.55	0.1	0.59
	oscillatory Horizontal B1	0.25	6.9	0.11	0.75
	oscillatory Horizontal B2	0.24	10	0.11	0.76
	oscillatory Sitting B1	0.2	7.7	0.1	0.58
	oscillatory Sitting B2	0.21	7.4	0.1	0.6
Left ОM	Samples/Indexes	RWA (Ohm)	VO (%)	АT (s)	CT (s)	Body positions/Indexes	RWA (Ohm)	VO (%)	АT (s)	CT (s)
	oscillatory Sitting A1	0.11	4.2	0.1	0.6	oscillatory Sitting A	0.115	3.7	0.1	0.62
	oscillatory Sitting A2	0.12	3.2	0.1	0.64	oscillatory Horizontal A	0.13	1.85	0.1	0.83
	oscillatory Horizontal A1	0.13	1.6	0.1	0.8	oscillatory Horizontal B	0.125	2.75	0.1	0.75
	oscillatory Horizontal A2	0.13	2.1	0.1	0.86	oscillatory Sitting B	0.12	5.45	0.1	0.595
	oscillatory Horizontal B1	0.13	1.9	0.1	0.75
	oscillatory Horizontal B2	0.12	3.6	0.1	0.75
	oscillatory Sitting B1	0.12	7.1	0.1	0.58
	oscillatory Sitting B2	0.12	3.8	0.1	0.61
Right ОM	Samples/Indexes	RWA (Ohm)	VO (%)	АT (s)	CT (s)	Body positions/Indexes	RWA (Ohm)	VO (%)	АT (s)	CT (s)
	oscillatory Sitting A1	0.24	4.9	0.1	0.57	oscillatory Sitting A	0.25	4.2	0.1	0.585
	oscillatory Sitting A2	0.26	3.5	0.1	0.6	oscillatory Horizontal A	0.25	3.35	0.105	0.855
	oscillatory Horizontal A1	0.25	3.8	0.1	0.83	oscillatory Horizontal B	0.24	10.65	0.11	0.77
	oscillatory Horizontal A2	0.25	2.9	0.11	0.88	oscillatory Sitting B	0.235	6.45	0.1	0.585
	oscillatory Horizontal B1	0.24	8.6	0.11	0.77
	oscillatory Horizontal B2	0.24	12.7	0.11	0.77
	oscillatory Sitting B1	0.23	6.6	0.1	0.58
	oscillatory Sitting B2	0.24	6.3	0.1	0.59

## Sheet: REG 4 D. (m)
Left FM	Samples/Indexes	RWA (Ohm)	VO (%)	АT (s)	CT (s)	Body positions/Indexes	RWA (Ohm)	VO (%)	АT (s)	CT (s)
	oscillatory Sitting A1	0.13	3.1	0.12	0.58	oscillatory Sitting A	0.125	2.1	0.115	0.565
	oscillatory Sitting A2	0.12	1.1	0.11	0.55	oscillatory Horizontal A	0.16	11.15	0.12	0.72
	oscillatory Horizontal A1	0.16	10.8	0.12	0.72	oscillatory Horizontal B	0.145	15.8	0.12	0.7
	oscillatory Horizontal A2	0.16	11.5	0.12	0.72	oscillatory Sitting B	0.13	1.05	0.115	0.575
	oscillatory Horizontal B1	0.14	14.9	0.12	0.7
	oscillatory Horizontal B2	0.15	16.7	0.12	0.7
	oscillatory Sitting B1	0.12	0.9	0.11	0.58
	oscillatory Sitting B2	0.14	1.2	0.12	0.57
Right FM	Samples/Indexes	RWA (Ohm)	VO (%)	АT (s)	CT (s)	Body positions/Indexes	RWA (Ohm)	VO (%)	АT (s)	CT (s)
	oscillatory Sitting A1	0.1	3.4	0.12	0.58	oscillatory Sitting A	0.1	3.8	0.115	0.575
	oscillatory Sitting A2	0.1	4.2	0.11	0.57	oscillatory Horizontal A	0.16	15.6	0.125	0.715
	oscillatory Horizontal A1	0.16	16.1	0.13	0.71	oscillatory Horizontal B	0.145	16.4	0.12	0.715
	oscillatory Horizontal A2	0.16	15.1	0.12	0.72	oscillatory Sitting B	0.11	2.9	0.115	0.605
	oscillatory Horizontal B1	0.14	15.7	0.12	0.71
	oscillatory Horizontal B2	0.15	17.1	0.12	0.72
	oscillatory Sitting B1	0.1	2.7	0.11	0.61
	oscillatory Sitting B2	0.12	3.1	0.12	0.6
Left ОM	Samples/Indexes	RWA (Ohm)	VO (%)	АT (s)	CT (s)	Body positions/Indexes	RWA (Ohm)	VO (%)	АT (s)	CT (s)
	oscillatory Sitting A1	0.1	1.2	0.1	0.52	oscillatory Sitting A	0.1	0.8	0.1	0.535
	oscillatory Sitting A2	0.1	0.4	0.1	0.55	oscillatory Horizontal A	0.125	5.85	0.11	0.7
	oscillatory Horizontal A1	0.13	5.6	0.11	0.7	oscillatory Horizontal B	0.095	15.65	0.12	0.71
	oscillatory Horizontal A2	0.12	6.1	0.11	0.7	oscillatory Sitting B	0.075	0.35	0.105	0.585
	oscillatory Horizontal B1	0.1	11.7	0.12	0.71
	oscillatory Horizontal B2	0.09	19.6	0.12	0.71
	oscillatory Sitting B1	0.07	0.5	0.1	0.59
	oscillatory Sitting B2	0.08	0.2	0.11	0.58
Right ОM	Samples/Indexes	RWA (Ohm)	VO (%)	АT (s)	CT (s)	Body positions/Indexes	RWA (Ohm)	VO (%)	АT (s)	CT (s)
	oscillatory Sitting A1	0.07	1.7	0.1	0.54	oscillatory Sitting A	0.075	1.3	0.095	0.545
	oscillatory Sitting A2	0.08	0.9	0.09	0.55	oscillatory Horizontal A	0.11	5.1	0.11	0.72
	oscillatory Horizontal A1	0.11	6.5	0.11	0.72	oscillatory Horizontal B	0.105	13.3	0.12	0.69
	oscillatory Horizontal A2	0.11	3.7	0.11	0.72	oscillatory Sitting B	0.075	0.75	0.09	0.59
	oscillatory Horizontal B1	0.11	10.7	0.12	0.69
	oscillatory Horizontal B2	0.1	15.9	0.12	0.69
	oscillatory Sitting B1	0.07	0.9	0.09	0.6
	oscillatory Sitting B2	0.08	0.6	0.09	0.58

## Sheet: REG 5 R. (m)
Left FM	Samples/Indexes	RWA (Ohm)	VO (%)	АT (s)	CT (s)	Body positions/Indexes	RWA (Ohm)	VO (%)	АT (s)	CT (s)
	oscillatory Sitting A1	0.1	1.9	0.1	0.45	oscillatory Sitting A	0.11	1.25	0.105	0.52
	oscillatory Sitting A2	0.12	0.6	0.11	0.59	oscillatory Horizontal A	0.19	7.2	0.13	0.745
	oscillatory Horizontal A1	0.2	6.3	0.13	0.74	oscillatory Horizontal B	0.18	7.55	0.14	0.78
	oscillatory Horizontal A2	0.18	8.1	0.13	0.75	oscillatory Sitting B	0.1	3.15	0.11	0.515
	oscillatory Horizontal B1	0.18	6.7	0.14	0.79
	oscillatory Horizontal B2	0.18	8.4	0.14	0.77
	oscillatory Sitting B1	0.1	3.4	0.11	0.53
	oscillatory Sitting B2	0.1	2.9	0.11	0.5
Right FM	Samples/Indexes	RWA (Ohm)	VO (%)	АT (s)	CT (s)	Body positions/Indexes	RWA (Ohm)	VO (%)	АT (s)	CT (s)
	oscillatory Sitting A1	0.1	3.2	0.12	0.51	oscillatory Sitting A	0.11	3.8	0.13	0.58
	oscillatory Sitting A2	0.12	4.4	0.14	0.65	oscillatory Horizontal A	0.175	9.95	0.155	0.775
	oscillatory Horizontal A1	0.18	8.4	0.16	0.77	oscillatory Horizontal B	0.16	10.45	0.145	0.81
	oscillatory Horizontal A2	0.17	11.5	0.15	0.78	oscillatory Sitting B	0.095	8.25	0.13	0.555
	oscillatory Horizontal B1	0.16	9.6	0.15	0.82
	oscillatory Horizontal B2	0.16	11.3	0.14	0.8
	oscillatory Sitting B1	0.09	8.4	0.13	0.57
	oscillatory Sitting B2	0.1	8.1	0.13	0.54
Left ОM	Samples/Indexes	RWA (Ohm)	VO (%)	АT (s)	CT (s)	Body positions/Indexes	RWA (Ohm)	VO (%)	АT (s)	CT (s)
	oscillatory Sitting A1	0.09	5	0.1	0.41	oscillatory Sitting A	0.095	3.95	0.105	0.455
	oscillatory Sitting A2	0.1	2.9	0.11	0.5	oscillatory Horizontal A	0.095	9.9	0.14	0.64
	oscillatory Horizontal A1	0.11	5.7	0.15	0.7	oscillatory Horizontal B	0.07	12.65	0.105	0.45
	oscillatory Horizontal A2	0.08	14.1	0.13	0.58	oscillatory Sitting B	0.09	0.65	0.11	0.475
	oscillatory Horizontal B1	0.04	15.5	0.08	0.13
	oscillatory Horizontal B2	0.1	9.8	0.13	0.77
	oscillatory Sitting B1	0.09	0.3	0.11	0.5
	oscillatory Sitting B2	0.09	1	0.11	0.45
Right ОM	Samples/Indexes	RWA (Ohm)	VO (%)	АT (s)	CT (s)	Body positions/Indexes	RWA (Ohm)	VO (%)	АT (s)	CT (s)
	oscillatory Sitting A1	0.11	3.8	0.1	0.44	oscillatory Sitting A	0.115	1.95	0.105	0.505
	oscillatory Sitting A2	0.12	0.1	0.11	0.57	oscillatory Horizontal A	0.12	12.95	0.145	0.78
	oscillatory Horizontal A1	0.13	11.8	0.14	0.78	oscillatory Horizontal B	0.11	8.7	0.14	0.79
	oscillatory Horizontal A2	0.11	14.1	0.15	0.78	oscillatory Sitting B	0.1	0.9	0.105	0.48
	oscillatory Horizontal B1	0.11	7.2	0.13	0.79
	oscillatory Horizontal B2	0.11	10.2	0.15	0.79
	oscillatory Sitting B1	0.1	0.1	0.1	0.5
	oscillatory Sitting B2	0.1	1.7	0.11	0.46

## Sheet: REG 6 M. (m)
Left FM	Samples/Indexes	RWA (Ohm)	VO (%)	АT (s)	CT (s)	Body positions/Indexes	RWA (Ohm)	VO (%)	АT (s)	CT (s)
	oscillatory Sitting A1	0.18	5.3	0.11	0.55	oscillatory Sitting A	0.18	4.75	0.11	0.56
	oscillatory Sitting A2	0.18	4.2	0.11	0.57	oscillatory Horizontal A	0.155	10.05	0.11	0.705
	oscillatory Horizontal A1	0.15	11.1	0.11	0.71	oscillatory Horizontal B	0.155	20.55	0.11	0.695
	oscillatory Horizontal A2	0.16	9	0.11	0.7	oscillatory Sitting B	0.175	4.4	0.12	0.605
	oscillatory Horizontal B1	0.15	24.2	0.11	0.66
	oscillatory Horizontal B2	0.16	16.9	0.11	0.73
	oscillatory Sitting B1	0.18	4.3	0.12	0.62
	oscillatory Sitting B2	0.17	4.5	0.12	0.59
Right FM	Samples/Indexes	RWA (Ohm)	VO (%)	АT (s)	CT (s)	Body positions/Indexes	RWA (Ohm)	VO (%)	АT (s)	CT (s)
	oscillatory Sitting A1	0.12	6.3	0.1	0.58	oscillatory Sitting A	0.115	6.2	0.1	0.585
	oscillatory Sitting A2	0.11	6.1	0.1	0.59	oscillatory Horizontal A	0.14	24.2	0.105	0.725
	oscillatory Horizontal A1	0.14	24.8	0.1	0.73	oscillatory Horizontal B	0.13	27.35	0.105	0.725
	oscillatory Horizontal A2	0.14	23.6	0.11	0.72	oscillatory Sitting B	0.11	6.2	0.105	0.63
	oscillatory Horizontal B1	0.13	28.2	0.1	0.69
	oscillatory Horizontal B2	0.13	26.5	0.11	0.76
	oscillatory Sitting B1	0.11	6.4	0.11	0.65
	oscillatory Sitting B2	0.11	6	0.1	0.61
Left ОM	Samples/Indexes	RWA (Ohm)	VO (%)	АT (s)	CT (s)	Body positions/Indexes	RWA (Ohm)	VO (%)	АT (s)	CT (s)
	oscillatory Sitting A1	0.2	4	0.1	0.53	oscillatory Sitting A	0.2	3.75	0.1	0.535
	oscillatory Sitting A2	0.2	3.5	0.1	0.54	oscillatory Horizontal A	0.165	6.05	0.1	0.695
	oscillatory Horizontal A1	0.16	6	0.1	0.7	oscillatory Horizontal B	0.15	6.95	0.1	0.685
	oscillatory Horizontal A2	0.17	6.1	0.1	0.69	oscillatory Sitting B	0.205	3.95	0.1	0.63
	oscillatory Horizontal B1	0.15	9.6	0.1	0.67
	oscillatory Horizontal B2	0.15	4.3	0.1	0.7
	oscillatory Sitting B1	0.2	3.9	0.1	0.65
	oscillatory Sitting B2	0.21	4	0.1	0.61
Right ОM	Samples/Indexes	RWA (Ohm)	VO (%)	АT (s)	CT (s)	Body positions/Indexes	RWA (Ohm)	VO (%)	АT (s)	CT (s)
	oscillatory Sitting A1	0.12	11	0.1	0.58	oscillatory Sitting A	0.12	10.65	0.1	0.59
	oscillatory Sitting A2	0.12	10.3	0.1	0.6	oscillatory Horizontal A	0.155	20.85	0.15	0.675
	oscillatory Horizontal A1	0.15	20.8	0.15	0.68	oscillatory Horizontal B	0.155	17.45	0.145	0.655
	oscillatory Horizontal A2	0.16	20.9	0.15	0.67	oscillatory Sitting B	0.195	8.75	0.105	0.635
	oscillatory Horizontal B1	0.15	20.6	0.14	0.63
	oscillatory Horizontal B2	0.16	14.3	0.15	0.68
	oscillatory Sitting B1	0.2	8	0.11	0.66
	oscillatory Sitting B2	0.19	9.5	0.1	0.61

## Sheet: REG 7 Zh. (m)
Left FM	Samples/Indexes	RWA (Ohm)	VO (%)	АT (s)	CT (s)	Body positions/Indexes	RWA (Ohm)	VO (%)	АT (s)	CT (s)
	oscillatory Sitting A1	0.11	8.6	0.1	0.58	oscillatory Sitting A	0.11	9.75	0.1	0.585
	oscillatory Sitting A2	0.11	10.9	0.1	0.59	oscillatory Horizontal A	0.15	15.45	0.12	0.63
	oscillatory Horizontal A1	0.15	16.1	0.12	0.63	oscillatory Horizontal B	0.145	14.9	0.125	0.63
	oscillatory Horizontal A2	0.15	14.8	0.12	0.63	oscillatory Sitting B	0.1	11.95	0.11	0.575
	oscillatory Horizontal B1	0.15	14.6	0.13	0.62
	oscillatory Horizontal B2	0.14	15.2	0.12	0.64
	oscillatory Sitting B1	0.1	10.6	0.11	0.58
	oscillatory Sitting B2	0.1	13.3	0.11	0.57
Right FM	Samples/Indexes	RWA (Ohm)	VO (%)	АT (s)	CT (s)	Body positions/Indexes	RWA (Ohm)	VO (%)	АT (s)	CT (s)
	oscillatory Sitting A1	0.1	6.5	0.09	0.58	oscillatory Sitting A	0.1	6.8	0.095	0.59
	oscillatory Sitting A2	0.1	7.1	0.1	0.6	oscillatory Horizontal A	0.12	18.3	0.1	0.655
	oscillatory Horizontal A1	0.12	17.8	0.1	0.65	oscillatory Horizontal B	0.11	21	0.105	0.66
	oscillatory Horizontal A2	0.12	18.8	0.1	0.66	oscillatory Sitting B	0.095	8.85	0.1	0.59
	oscillatory Horizontal B1	0.11	20.4	0.11	0.66
	oscillatory Horizontal B2	0.11	21.6	0.1	0.66
	oscillatory Sitting B1	0.1	6.7	0.1	0.59
	oscillatory Sitting B2	0.09	11	0.1	0.59
Left ОM	Samples/Indexes	RWA (Ohm)	VO (%)	АT (s)	CT (s)	Body positions/Indexes	RWA (Ohm)	VO (%)	АT (s)	CT (s)
	oscillatory Sitting A1	0.09	3.2	0.09	0.59	oscillatory Sitting A	0.09	3.4	0.09	0.6
	oscillatory Sitting A2	0.09	3.6	0.09	0.61	oscillatory Horizontal A	0.1	12.8	0.1	0.665
	oscillatory Horizontal A1	0.1	15.1	0.1	0.66	oscillatory Horizontal B	0.095	19.1	0.1	0.66
	oscillatory Horizontal A2	0.1	10.5	0.1	0.67	oscillatory Sitting B	0.085	4.65	0.09	0.58
	oscillatory Horizontal B1	0.1	18.7	0.1	0.64
	oscillatory Horizontal B2	0.09	19.5	0.1	0.68
	oscillatory Sitting B1	0.09	4	0.09	0.58
	oscillatory Sitting B2	0.08	5.3	0.09	0.58
Right ОM	Samples/Indexes	RWA (Ohm)	VO (%)	АT (s)	CT (s)	Body positions/Indexes	RWA (Ohm)	VO (%)	АT (s)	CT (s)
	oscillatory Sitting A1	0.1	2.2	0.09	0.57	oscillatory Sitting A	0.1	2.9	0.09	0.585
	oscillatory Sitting A2	0.1	3.6	0.09	0.6	oscillatory Horizontal A	0.09	3.85	0.1	0.62
	oscillatory Horizontal A1	0.09	4.4	0.1	0.62	oscillatory Horizontal B	0.075	5.35	0.1	0.66
	oscillatory Horizontal A2	0.09	3.3	0.1	0.62	oscillatory Sitting B	0.095	2.8	0.09	0.575
	oscillatory Horizontal B1	0.08	5.1	0.1	0.63
	oscillatory Horizontal B2	0.07	5.6	0.1	0.69
	oscillatory Sitting B1	0.1	2.7	0.09	0.57
	oscillatory Sitting B2	0.09	2.9	0.09	0.58

## Sheet: REG 8 S. (m)
Left FM	Samples/Indexes	RWA (Ohm)	VO (%)	АT (s)	CT (s)	Body positions/Indexes	RWA (Ohm)	VO (%)	АT (s)	CT (s)
	oscillatory Sitting A1	0.12	4.6	0.1	0.48	oscillatory Sitting A	0.115	4.55	0.105	0.52
	oscillatory Sitting A2	0.11	4.5	0.11	0.56	oscillatory Horizontal A	0.165	11.9	0.12	0.765
	oscillatory Horizontal A1	0.16	12.4	0.12	0.76	oscillatory Horizontal B	0.135	16.2	0.12	0.67
	oscillatory Horizontal A2	0.17	11.4	0.12	0.77	oscillatory Sitting B	0.13	6.1	0.11	0.535
	oscillatory Horizontal B1	0.13	14.8	0.12	0.67
	oscillatory Horizontal B2	0.14	17.6	0.12	0.67
	oscillatory Sitting B1	0.13	6	0.11	0.55
	oscillatory Sitting B2	0.13	6.2	0.11	0.52
Right FM	Samples/Indexes	RWA (Ohm)	VO (%)	АT (s)	CT (s)	Body positions/Indexes	RWA (Ohm)	VO (%)	АT (s)	CT (s)
	oscillatory Sitting A1	0.13	8.5	0.1	0.5	oscillatory Sitting A	0.125	8.3	0.105	0.535
	oscillatory Sitting A2	0.12	8.1	0.11	0.57	oscillatory Horizontal A	0.135	12.7	0.11	0.785
	oscillatory Horizontal A1	0.13	11.8	0.11	0.77	oscillatory Horizontal B	0.125	12.4	0.1	0.655
	oscillatory Horizontal A2	0.14	13.6	0.11	0.8	oscillatory Sitting B	0.125	10.65	0.11	0.555
	oscillatory Horizontal B1	0.12	11.1	0.1	0.65
	oscillatory Horizontal B2	0.13	13.7	0.1	0.66
	oscillatory Sitting B1	0.12	11	0.11	0.56
	oscillatory Sitting B2	0.13	10.3	0.11	0.55
Left ОM	Samples/Indexes	RWA (Ohm)	VO (%)	АT (s)	CT (s)	Body positions/Indexes	RWA (Ohm)	VO (%)	АT (s)	CT (s)
	oscillatory Sitting A1	0.13	4.1	0.11	0.49	oscillatory Sitting A	0.125	3.1	0.105	0.515
	oscillatory Sitting A2	0.12	2.1	0.1	0.54	oscillatory Horizontal A	0.145	7.2	0.115	0.745
	oscillatory Horizontal A1	0.14	7.3	0.11	0.73	oscillatory Horizontal B	0.12	20.9	0.11	0.675
	oscillatory Horizontal A2	0.15	7.1	0.12	0.76	oscillatory Sitting B	0.13	6.55	0.11	0.53
	oscillatory Horizontal B1	0.12	21.9	0.11	0.68
	oscillatory Horizontal B2	0.12	19.9	0.11	0.67
	oscillatory Sitting B1	0.13	7.3	0.11	0.54
	oscillatory Sitting B2	0.13	5.8	0.11	0.52
Right ОM	Samples/Indexes	RWA (Ohm)	VO (%)	АT (s)	CT (s)	Body positions/Indexes	RWA (Ohm)	VO (%)	АT (s)	CT (s)
	oscillatory Sitting A1	0.16	12	0.1	0.51	oscillatory Sitting A	0.16	10.6	0.1	0.54
	oscillatory Sitting A2	0.16	9.2	0.1	0.57	oscillatory Horizontal A	0.08	8.05	0.11	0.75
	oscillatory Horizontal A1	0.08	10.2	0.11	0.76	oscillatory Horizontal B	0.08	15.45	0.1	0.66
	oscillatory Horizontal A2	0.08	5.9	0.11	0.74	oscillatory Sitting B	0.16	11.7	0.11	0.555
	oscillatory Horizontal B1	0.08	15.3	0.1	0.67
	oscillatory Horizontal B2	0.08	15.6	0.1	0.65
	oscillatory Sitting B1	0.16	12.6	0.11	0.57
	oscillatory Sitting B2	0.16	10.8	0.11	0.54

## Sheet: REG 9 S. (m)
Left FM	Samples/Indexes	RWA (Ohm)	VO (%)	АT (s)	CT (s)	Body positions/Indexes	RWA (Ohm)	VO (%)	АT (s)	CT (s)
	oscillatory Sitting A1	0.08	9.1	0.11	0.54	oscillatory Sitting A	0.08	8.7	0.115	0.565
	oscillatory Sitting A2	0.08	8.3	0.12	0.59	oscillatory Horizontal A	0.125	9.4	0.125	0.825
	oscillatory Horizontal A1	0.13	9	0.13	0.85	oscillatory Horizontal B	0.1	12.2	0.12	0.765
	oscillatory Horizontal A2	0.12	9.8	0.12	0.8	oscillatory Sitting B	0.065	7.15	0.11	0.46
	oscillatory Horizontal B1	0.1	13.2	0.12	0.77
	oscillatory Horizontal B2	0.1	11.2	0.12	0.76
	oscillatory Sitting B1	0.06	7.5	0.11	0.47
	oscillatory Sitting B2	0.07	6.8	0.11	0.45
Right FM	Samples/Indexes	RWA (Ohm)	VO (%)	АT (s)	CT (s)	Body positions/Indexes	RWA (Ohm)	VO (%)	АT (s)	CT (s)
	oscillatory Sitting A1	0.08	8.1	0.1	0.54	oscillatory Sitting A	0.085	8.3	0.105	0.575
	oscillatory Sitting A2	0.09	8.5	0.11	0.61	oscillatory Horizontal A	0.145	10.25	0.115	0.84
	oscillatory Horizontal A1	0.15	10.2	0.12	0.87	oscillatory Horizontal B	0.12	14.1	0.115	0.795
	oscillatory Horizontal A2	0.14	10.3	0.11	0.81	oscillatory Sitting B	0.07	11.6	0.11	0.485
	oscillatory Horizontal B1	0.12	14.8	0.11	0.79
	oscillatory Horizontal B2	0.12	13.4	0.12	0.8
	oscillatory Sitting B1	0.07	10.3	0.11	0.49
	oscillatory Sitting B2	0.07	12.9	0.11	0.48
Left ОM	Samples/Indexes	RWA (Ohm)	VO (%)	АT (s)	CT (s)	Body positions/Indexes	RWA (Ohm)	VO (%)	АT (s)	CT (s)
	oscillatory Sitting A1	0.07	6.5	0.1	0.55	oscillatory Sitting A	0.075	5.35	0.1	0.575
	oscillatory Sitting A2	0.08	4.2	0.1	0.6	oscillatory Horizontal A	0.12	13.3	0.105	0.88
	oscillatory Horizontal A1	0.13	12.4	0.11	0.91	oscillatory Horizontal B	0.11	12	0.11	0.81
	oscillatory Horizontal A2	0.11	14.2	0.1	0.85	oscillatory Sitting B	0.065	7.95	0.1	0.48
	oscillatory Horizontal B1	0.11	11	0.11	0.81
	oscillatory Horizontal B2	0.11	13	0.11	0.81
	oscillatory Sitting B1	0.06	8.5	0.1	0.49
	oscillatory Sitting B2	0.07	7.4	0.1	0.47
Right ОM	Samples/Indexes	RWA (Ohm)	VO (%)	АT (s)	CT (s)	Body positions/Indexes	RWA (Ohm)	VO (%)	АT (s)	CT (s)
	oscillatory Sitting A1	0.08	13.6	0.11	0.57	oscillatory Sitting A	0.085	12.5	0.11	0.595
	oscillatory Sitting A2	0.09	11.4	0.11	0.62	oscillatory Horizontal A	0.115	11.45	0.11	0.83
	oscillatory Horizontal A1	0.12	9.8	0.11	0.85	oscillatory Horizontal B	0.105	7.65	0.11	0.755
	oscillatory Horizontal A2	0.11	13.1	0.11	0.81	oscillatory Sitting B	0.09	16.65	0.1	0.505
	oscillatory Horizontal B1	0.1	6	0.11	0.75
	oscillatory Horizontal B2	0.11	9.3	0.11	0.76
	oscillatory Sitting B1	0.09	16.4	0.1	0.51
	oscillatory Sitting B2	0.09	16.9	0.1	0.5

## Sheet: REG 10 Zh. (m)
Left FM	Samples/Indexes	RWA (Ohm)	VO (%)	АT (s)	CT (s)	Body positions/Indexes	RWA (Ohm)	VO (%)	АT (s)	CT (s)
	oscillatory Sitting A1	0.11	9.2	0.11	0.5	oscillatory Sitting A	0.105	8.1	0.11	0.505
	oscillatory Sitting A2	0.1	7	0.11	0.51	oscillatory Horizontal A	0.07	3.15	0.095	0.57
	oscillatory Horizontal A1	0.08	5.9	0.1	0.59	oscillatory Horizontal B	0.075	6.05	0.1	0.625
	oscillatory Horizontal A2	0.06	0.4	0.09	0.55	oscillatory Sitting B	0.09	7.4	0.1	0.515
	oscillatory Horizontal B1	0.07	4.8	0.1	0.64
	oscillatory Horizontal B2	0.08	7.3	0.1	0.61
	oscillatory Sitting B1	0.09	5.3	0.1	0.53
	oscillatory Sitting B2	0.09	9.5	0.1	0.5
Right FM	Samples/Indexes	RWA (Ohm)	VO (%)	АT (s)	CT (s)	Body positions/Indexes	RWA (Ohm)	VO (%)	АT (s)	CT (s)
	oscillatory Sitting A1	0.11	18.3	0.11	0.53	oscillatory Sitting A	0.105	17.75	0.11	0.53
	oscillatory Sitting A2	0.1	17.2	0.11	0.53	oscillatory Horizontal A	0.08	6.2	0.09	0.625
	oscillatory Horizontal A1	0.08	5.6	0.09	0.61	oscillatory Horizontal B	0.085	10.5	0.095	0.67
	oscillatory Horizontal A2	0.08	6.8	0.09	0.64	oscillatory Sitting B	0.1	12.9	0.1	0.52
	oscillatory Horizontal B1	0.08	10.9	0.09	0.69
	oscillatory Horizontal B2	0.09	10.1	0.1	0.65
	oscillatory Sitting B1	0.1	8.7	0.1	0.54
	oscillatory Sitting B2	0.1	17.1	0.1	0.5
Left ОM	Samples/Indexes	RWA (Ohm)	VO (%)	АT (s)	CT (s)	Body positions/Indexes	RWA (Ohm)	VO (%)	АT (s)	CT (s)
	oscillatory Sitting A1	0.1	6.5	0.1	0.53	oscillatory Sitting A	0.1	5.75	0.1	0.53
	oscillatory Sitting A2	0.1	5	0.1	0.53	oscillatory Horizontal A	0.075	2.15	0.1	0.53
	oscillatory Horizontal A1	0.08	2.5	0.1	0.55	oscillatory Horizontal B	0.08	4.95	0.1	0.545
	oscillatory Horizontal A2	0.07	1.8	0.1	0.51	oscillatory Sitting B	0.07	4.25	0.09	0.515
	oscillatory Horizontal B1	0.07	8.1	0.1	0.52
	oscillatory Horizontal B2	0.09	1.8	0.1	0.57
	oscillatory Sitting B1	0.07	2.3	0.09	0.52
	oscillatory Sitting B2	0.07	6.2	0.09	0.51
Right ОM	Samples/Indexes	RWA (Ohm)	VO (%)	АT (s)	CT (s)	Body positions/Indexes	RWA (Ohm)	VO (%)	АT (s)	CT (s)
	oscillatory Sitting A1	0.1	9.7	0.09	0.52	oscillatory Sitting A	0.1	10.5	0.09	0.525
	oscillatory Sitting A2	0.1	11.3	0.09	0.53	oscillatory Horizontal A	0.075	9.05	0.1	0.58
	oscillatory Horizontal A1	0.08	12	0.1	0.59	oscillatory Horizontal B	0.075	8.35	0.095	0.58
	oscillatory Horizontal A2	0.07	6.1	0.1	0.57	oscillatory Sitting B	0.085	4.05	0.09	0.5
	oscillatory Horizontal B1	0.07	5.7	0.09	0.57
	oscillatory Horizontal B2	0.08	11	0.1	0.59
	oscillatory Sitting B1	0.08	2.2	0.09	0.51
	oscillatory Sitting B2	0.09	5.9	0.09	0.49

[truncated: 59 more sheets: REG 11 K. (m), REG 12 S. (m), REG 13 G. (m), REG 14 P. (m), REG 15 S. (m), REG 16 Sh. (m), REG 17 M. (m), EEG 1 G. (m), EEG 2 Z. (m), EEG 3 L. (m), EEG 4 D. (m), EEG 5 R. (m), EEG 6 M. (m), EEG 7 Zh. (m), EEG 8 S. (m), EEG 9 S. (m), EEG 10 Zh. (m), EEG 11 K. (m), EEG 12 S. (m), EEG 13 G. (m) …]
